# Supplementary material
Source: publisher figshare collection journal article supplement (https://karger.figshare.com/ndownloader/files/35081716)
Supplement: Supplementary file 1 [file 35081716]

**Supplementary Material 1.** Search algorithm in PubMed

("greenspace"[TIAB] OR "greenspaces"[TIAB] OR "green-space"[TIAB] OR "green space"[TIAB] OR "green spaces"[TIAB] OR "green infrastructure"[TIAB] OR "green infrastructures"[TIAB] OR "green area"[TIAB] OR "green areas"[TIAB] OR "green belt"[TIAB] OR "green belts"[TIAB] OR "green environment"[TIAB] OR "green environments"[TIAB] OR "greening project"[TIAB] OR "green element"[TIAB] OR "green elements"[TIAB] OR "urban green"[TIAB] OR "greenery"[TIAB] OR "greenness"[TIAB] OR "greenbelt"[TIAB] OR "greener"[TIAB] OR "normalized difference vegetation index"[TIAB] OR "NDVI"[TIAB] OR "natural element"[TIAB] OR "natural elements"[TIAB] OR "natural environment"[TIAB] OR "natural environments"[TIAB] OR "natural outdoor environment"[TIAB] OR "natural outdoor environments"[TIAB] OR "natural surroundings"[TIAB] OR "natural space"[TIAB] OR "natural spaces"[TIAB] OR "natural area"[TIAB] OR "natural areas"[TIAB] OR "natural land"[TIAB] OR "open space"[TIAB] OR "open spaces"[TIAB] OR "open land"[TIAB] OR "open area"[TIAB] OR "open areas"[TIAB] OR "walkable area"[TIAB] OR "walkable areas"[TIAB] OR "vegetated area"[TIAB] OR "vegetated areas"[TIAB] OR "public space"[TIAB] OR "public spaces"[TIAB] OR "public area"[TIAB] OR "public areas"[TIAB] OR "public land"[TIAB] OR "wild land"[TIAB] OR "wild area"[TIAB] OR "wild areas"[TIAB] OR "nature"[TIAB] OR "vegetation"[TIAB] OR "park"[TIAB] OR "parks"[TIAB] OR "parkland"[TIAB] OR "garden"[TIAB] OR "gardens"[TIAB] OR "forest"[TIAB] OR "forests"[TIAB] OR "tree"[TIAB] OR "trees"[TIAB] OR "landscape"[TIAB] OR "woodland"[TIAB] OR "woodlands"[TIAB] OR "wilderness"[TIAB] OR "walkability"[TIAB]) AND (“overweight”[MESH] OR “obesity”[MeSH] OR “obesity”[TIAB] OR “obese”[TIAB] OR “adiposity”[TIAB] OR “overweight”[TIAB] OR “body mass index”[TIAB] OR “BMI”[TIAB] OR “body weight”[TIAB] OR “waist circumference”[TIAB] OR “waist to hip”[TIAB] OR “waist-to-hip”[TIAB] OR “body fat”[TIAB]) AND (“China”[MeSH] OR “China”[ALL] OR “Chinese”[ALL])AND English[lang] AND "humans"[MeSH]
